# Supplementary material for: Two highly stable inorganic–organic hybrid 3D frameworks based on Cu–Ln incorporated polyoxometalates for selective dye removal and proton conduction
Source: Royal Society of Chemistry journal article supplement (doi:10.1039/d1ce00218j), 2021-01-01
Supplement: d1ce00218j1.pdf [file d1ce00218j1.pdf]

*Electronic supplementary information*

---

**Two highly stable inorganic-organic hybrid 3-D frameworks based on  
Cu–Ln incorporated polyoxometalate for selective dye removal and  
proton conduction**

Rong-Tao Zhang,<sup>†a</sup> Hui-Ping Xiao,<sup>†a</sup> Zhong Li,<sup>a</sup> Min Wang,<sup>a</sup> Yu-Feng Xie,<sup>a</sup> Yi-Da Ye,<sup>a</sup> Xin-Xiong Li<sup>\*ab</sup> and Shou-Tian Zheng<sup>\*a</sup>

<sup>a</sup>State Key Laboratory of Photocatalysis on Energy and Environment, College of Chemistry, Fuzhou University, Fuzhou, Fujian 350108, China. E-mail: [lx@fzu.edu.cn](mailto:lx@fzu.edu.cn); [stzheng@fzu.edu.cn](mailto:stzheng@fzu.edu.cn).

<sup>b</sup>State Key Laboratory of Structural Chemistry, Fujian Institute of Research on the Structure of Matter, Chinese Academy of Sciences, Fuzhou, Fujian 350002, China.

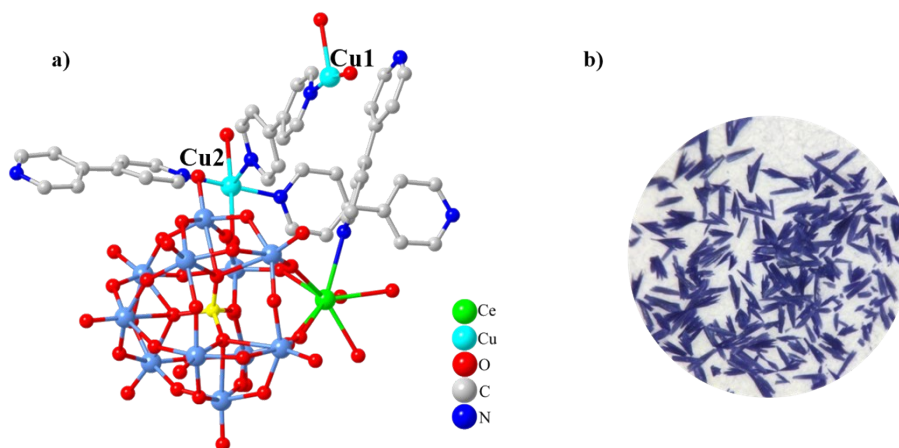

Fig. S1 The asymmetric unit of **1** (a) and the photograph of the crystal morphology of **1** (b)

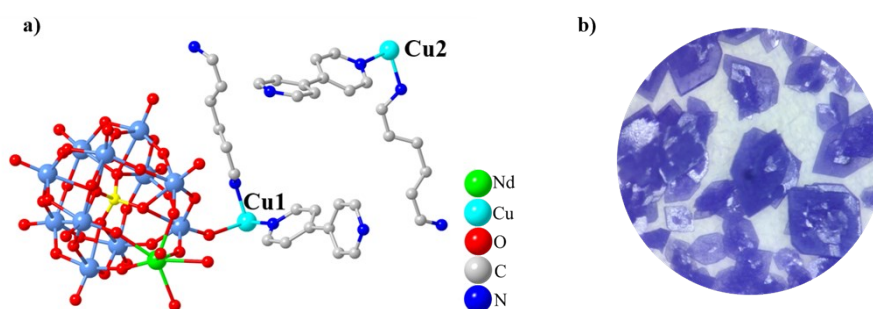

Fig. S2 The asymmetric unit of **2** (a) and the photograph of the crystal morphology of **2** (b)

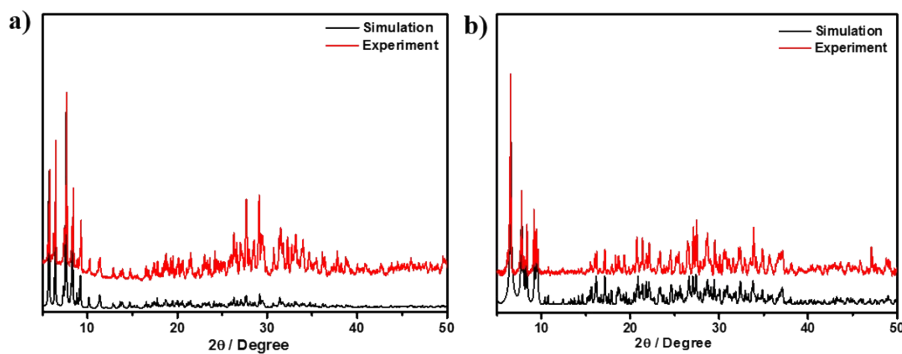

Fig. S3 PXRD patterns for **1** and **2**.

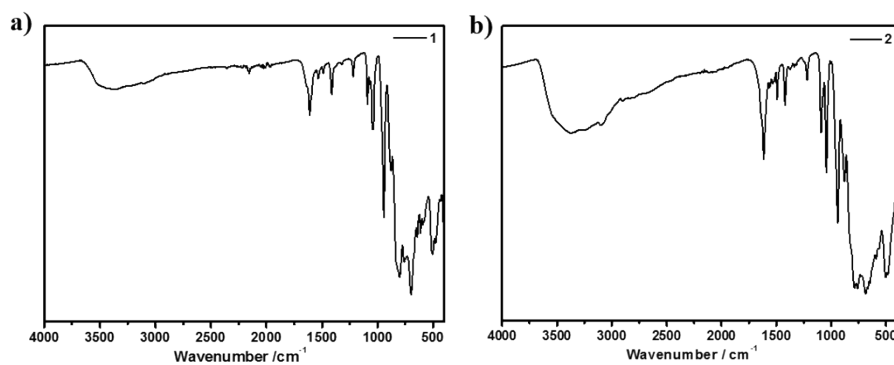

Fig. S4 FT-IR spectra for **1** and **2**.

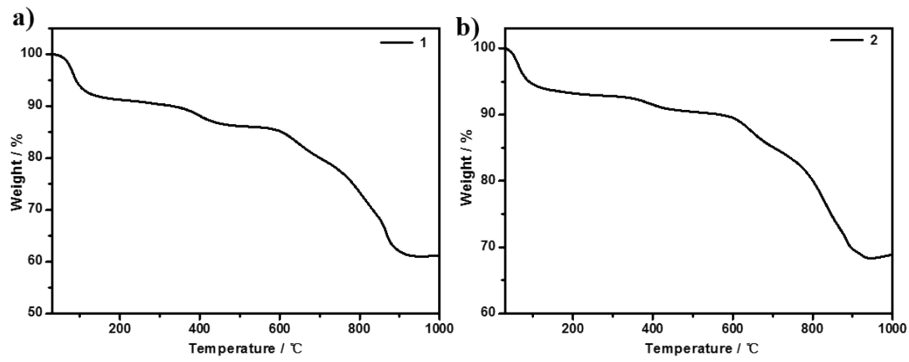

Fig. S5 TGA curves for **1** and **2**.

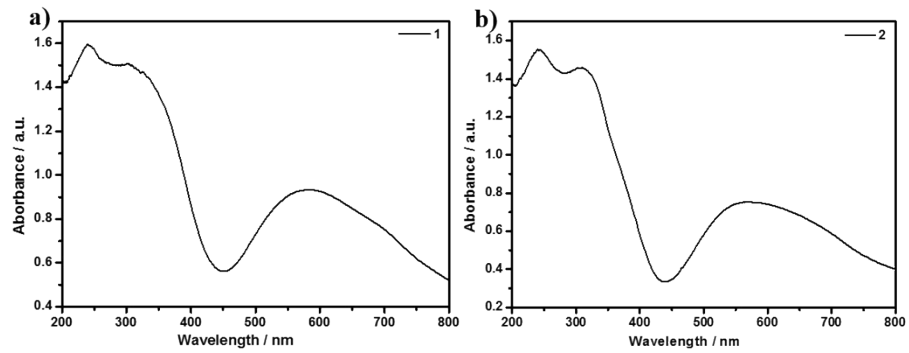

Fig. S6 Solid-state UV-Vis absorption spectra of **1** and **2**.

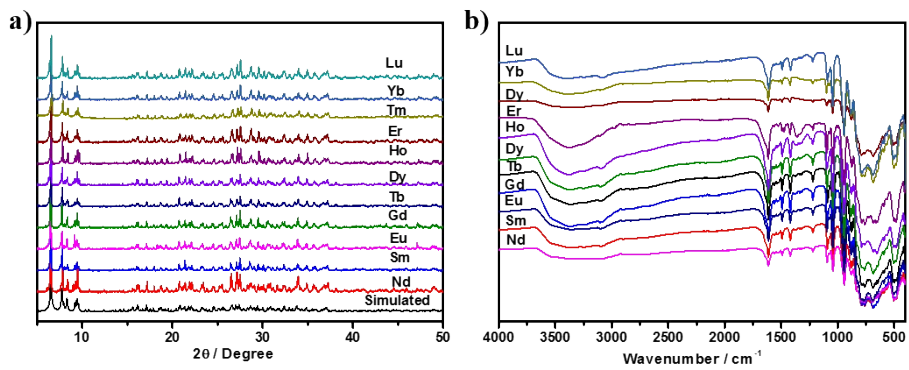

Fig. S7 PXRD patterns (a) and FT-IR spectra (b) for the isostructural compounds of **2**

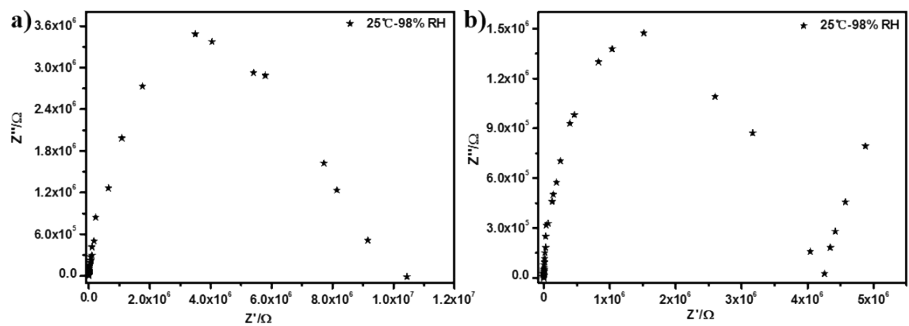

Fig. S8 Nyquist plots for **1** (a) and **2** (b) at 25 °C and 98% RH.

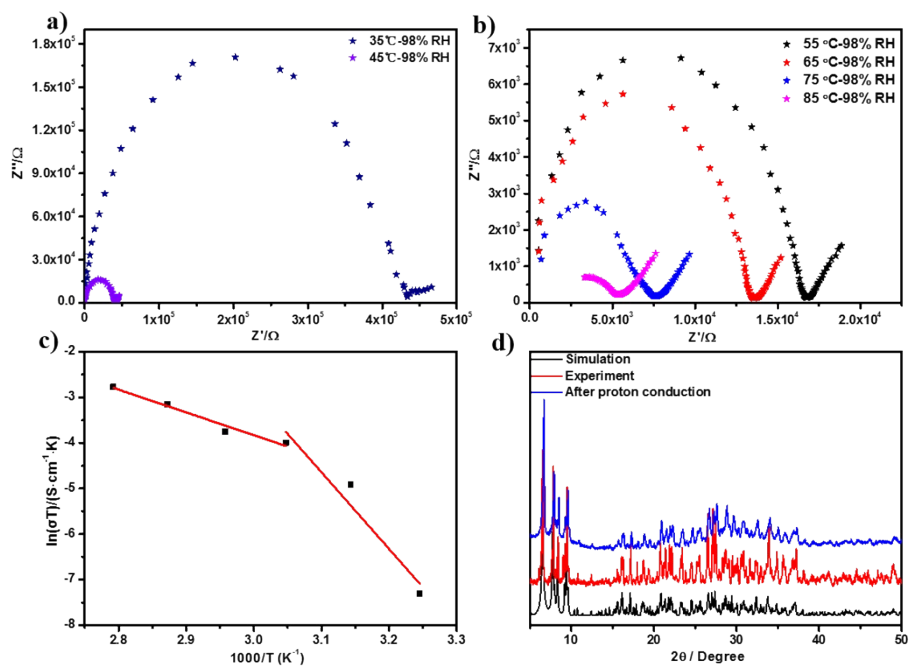

**Fig. S9** (a) and (b) Nyquist plots for **2** under different temperatures at 98% RH; (c) Arrhenius plots and linear fitting of the temperature-dependent proton; (d) PXR patterns after proton conduction for **2**.

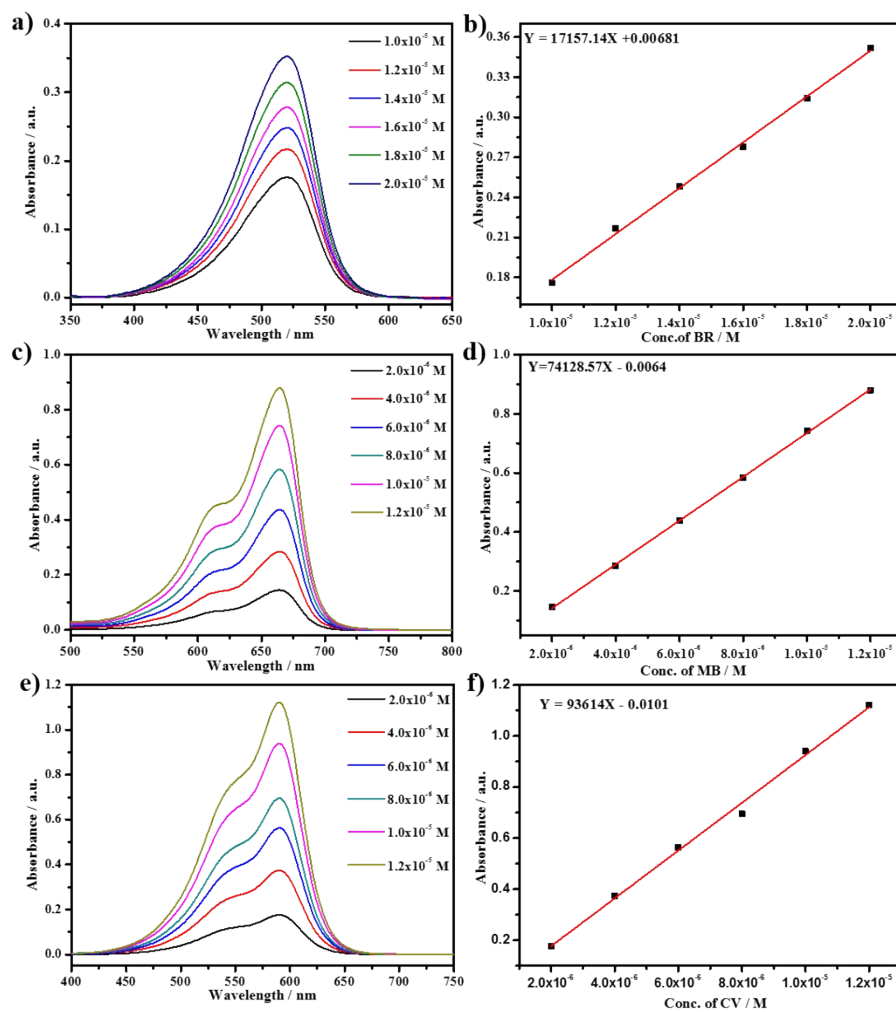

**Fig. S10.** Calibration plots of standard BR, MB and CV (a & c & e) by UV-Vis spectra in aqueous solution and their

fitting of Abs. vs concentration of respective dye values (b & d & f)

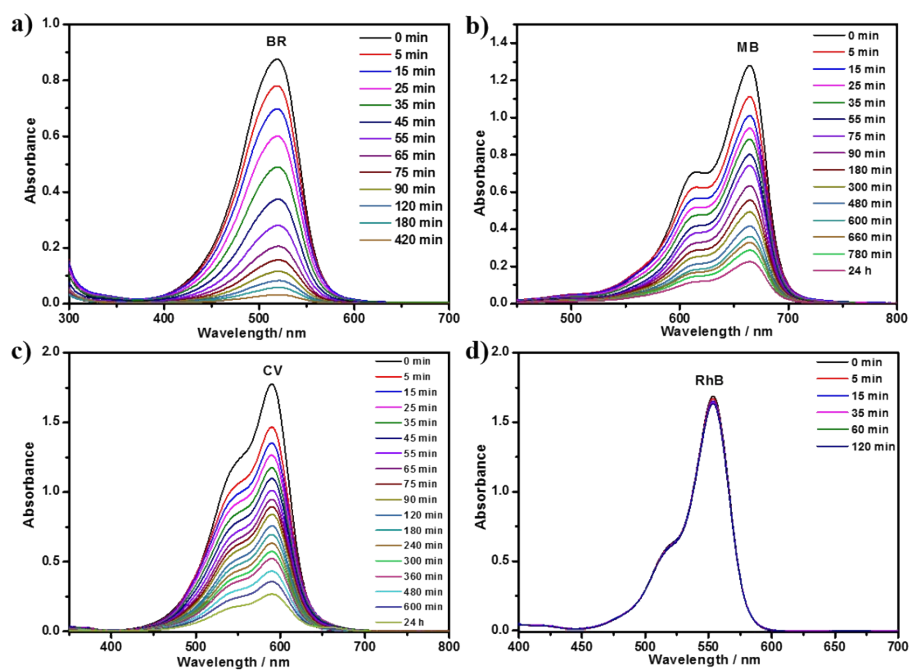

**Fig. S11** UV-Vis spectra of cationic dye solutions during an adsorption test with **2** (a) BR, (b) MB, (c) CV, (d) RhB.

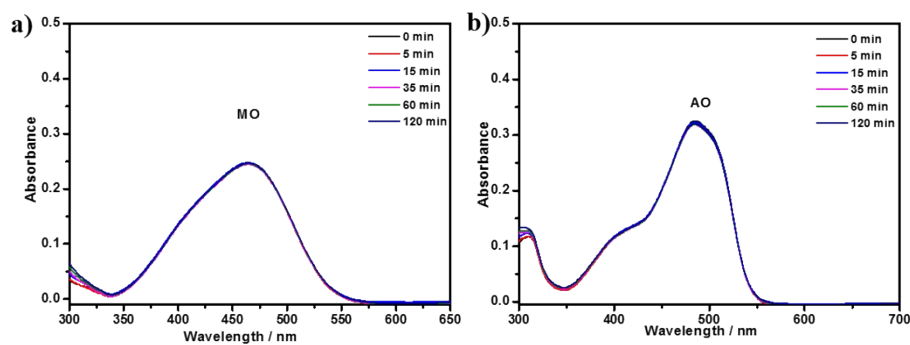

**Fig. S12** UV-Vis spectra of anion dye solutions during an adsorption test with **2** (a) MO and (b) AO.

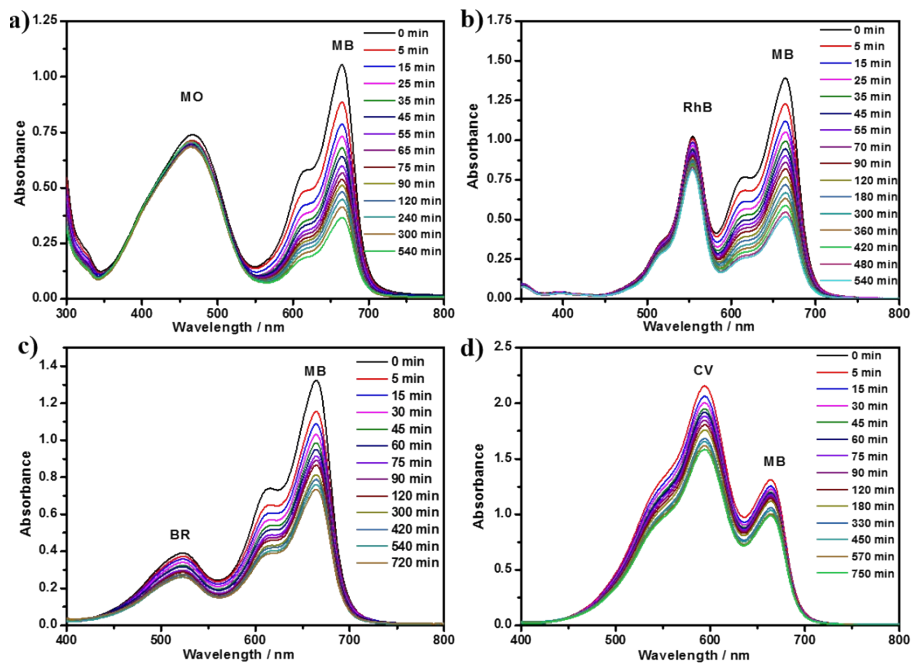

**Fig. S13** UV/vis absorption spectra of the mixed dye solutions of MO and MB (a), RhB and MB (b), MB and BR (c), and MB and CV (e) show the adsorption processes with **2** at different times.

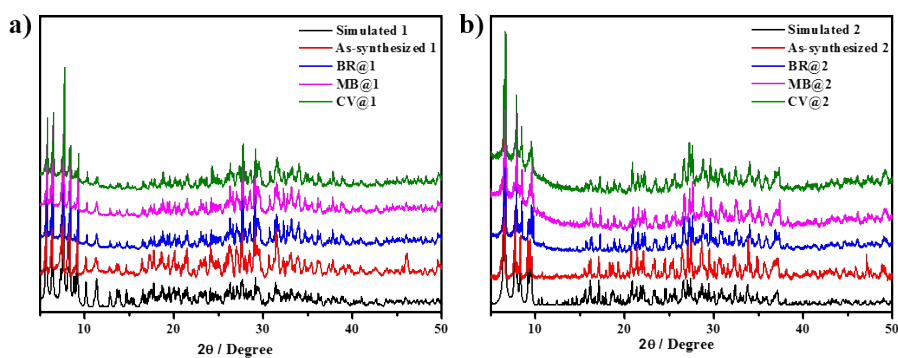

**Fig. S14.** PXRD patterns of as-synthesized and dye-adsorbed samples for **1** (a) and **2** (b)

**Table. S1** Characteristics of organic dye molecules: RhB: Rhodamine B; BR: Basic Red; CV: Crystal Violet; MB: Methylene Blue; MO: Methyl Orange; AO: Acid Orange.

| Name      | Cationic                                                                          |                                                                                   |                                                                                   |                                                                                    | Anionic                                                                             |                                                                                     |
|-----------|-----------------------------------------------------------------------------------|-----------------------------------------------------------------------------------|-----------------------------------------------------------------------------------|------------------------------------------------------------------------------------|-------------------------------------------------------------------------------------|-------------------------------------------------------------------------------------|
|           | RhB                                                                               | BR                                                                                | CV                                                                                | MB                                                                                 | MO                                                                                  | AO                                                                                  |
| Structure | 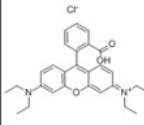 |  |  |  |  |  |
| Colour    | Pink                                                                              | Red                                                                               | Violet                                                                            | Blue                                                                               | Orange                                                                              | Orange                                                                              |
| Charge    | +1                                                                                | +1                                                                                | +1                                                                                | +1                                                                                 | -1                                                                                  | -1                                                                                  |
| MW.       | 443.6                                                                             | 315.4                                                                             | 372.5                                                                             | 284.4                                                                              | 327.3                                                                               | 350.3                                                                               |
| X (Å)     | 6.79                                                                              | 4.30                                                                              | 4.00                                                                              | 4.00                                                                               | 5.31                                                                                | 5.44                                                                                |
| Y (Å)     | 11.80                                                                             | 9.40                                                                              | 12.97                                                                             | 7.93                                                                               | 7.25                                                                                | 10.03                                                                               |
| Z (Å)     | 15.68                                                                             | 11.39                                                                             | 13.74                                                                             | 16.34                                                                              | 17.39                                                                               | 15.67                                                                               |
